# Supplementary material for: Can vaccination coverage be improved by reducing missed opportunities for vaccination? Findings from assessments in Chad and Malawi using the new WHO methodology
Source: PubMed Central journal article supplement (PMC6345496; doi:10.1371/journal.pone.0210648), 2019-01-24
Supplement: pone.0210648.s001.pdf [file pone.0210648.s001.pdf]

## ANNEXE 4 : ENQUÊTE DE SORTIE DES ÉTABLISSEMENTS DE SANTÉ

Bonjour. Je m'appelle \_\_\_\_\_ et je réalise une évaluation du programme de vaccination des enfants dans votre région. Notre objectif est de permettre l'amélioration générale du programme de vaccination. J'aimerais vous demander de nous aider en répondant aux questions de cette enquête. Je sais que vous êtes très occupé, cela ne prendra que quelques minutes.

Votre participation est volontaire et anonyme.

Souhaitez-vous répondre à mes questions ? Nous vous en remercions chaleureusement.\*

Numéro de série du questionnaire pour la formation sanitaire: \_\_\_\_/\_\_\_\_

### A. Type de service

1. Service public/gouvernemental

2. Privé

4. Autre  Précisez : \_\_\_\_\_

### Date de l'enquête

Jour \_\_\_\_/\_\_\_\_/\_\_\_\_ Mois \_\_\_\_/\_\_\_\_/\_\_\_\_ Année \_\_\_\_/\_\_\_\_/\_\_\_\_

### B. Type d'établissement de santé\*

1. Hôpital

2. Clinique

3. Centre de santé

### C. Filtre

L'enfant qui accompagne l'adulte semble avoir moins de 24 mois

1. Oui ➔ POURSUIVEZ

2. Non ➔ REMERCIEZ LA PERSONNE ET MENTIONNEZ LA RENCONTRE CI-DESSOUS

### SITUATION GÉOGRAPHIQUE

État/Région \_\_\_\_\_

District \_\_\_\_\_

Nom de l'établissement \_\_\_\_\_

Date de l'entretien \_\_\_\_\_

*Nom*

Enquêteur \_\_\_\_\_

Superviseur \_\_\_\_\_

| Heure de début | matin | après-midi |
|----------------|-------|------------|
| Heure          |       |            |
| Minutes        |       |            |

### DONNÉES SUR L'ENFANT

(SI L'ADULTE ACCOMPAGNE PLUS D'UN ENFANT, SEUL LE PLUS JEUNE SERA PRIS EN COMPTE DANS L'ÉVALUATION, DANS LE CAS DE JUMEAUX, CHOISIR CELUI QUI EST NÉ LE DERNIER)

1. Date de naissance Jour \_\_\_\_/\_\_\_\_/\_\_\_\_ Mois \_\_\_\_/\_\_\_\_/\_\_\_\_ Année \_\_\_\_/\_\_\_\_/\_\_\_\_

1.1 Âge de l'enfant 99 NSP (Ne sait pas) / PR (Pas de réponse)

1. Années \_\_\_\_\_

2. Mois \_\_\_\_\_

3. Semaines \_\_\_\_\_

2. Sexe

Masculin  Féminin

3. Pourquoi avoir amené l'enfant à cet établissement de santé aujourd'hui ? (NE PAS LIRE LES PROPOSITIONS)

1. Pour une consultation médicale (enfant malade)

2. Pour une vaccination

3. Bilan de santé/de croissance ou visite d'un enfant en bonne santé

4. Pour accompagner la personne qui le soigne ou son frère/sa sœur à l'établissement de santé

5. Hospitalisation

6. Autre  Précisez : \_\_\_\_\_

### DONNÉES SOCIODÉMOGRAPHIQUES SUR LA PERSONNE QUI ACCOMPAGNE L'ENFANT, SON PARENT/TUTEUR

4. Âge (ans) : \_\_\_\_\_

5. Sexe 1. Masculin

2. Féminin

\* Comprend d'autres types d'établissement de soins comme les cabinets médicaux, les dispensaires, les cliniques temporaires et les centres de vaccination.

6. Quel lien avez-vous avec l'enfant ?

1. Mère

2. Père

3. Grand-parent

4. Oncle/tante

5. Frère/sœur

6. Autre  Précisez : \_\_\_\_\_

7. Situation familiale :

1. Célibataire

2. Marié(e)

3. En concubinage

4. Séparé(e)/divorcé(e)

5. Veuf/veuve

8. Scolarisation

1. Aucune mais sait lire et écrire

2. Aucune, ne sait ni lire ni écrire

3. Primaire ou moins

4. Secondaire, non achevé

5. Secondaire achevé

6. Au-delà du secondaire

9. Métier

1. Ménagère (s'occupe des tâches domestiques)

2. Employé ou ouvrier

3. Travailleur indépendant

4. Patron ou employeur

5. Autre  Précisez : \_\_\_\_\_

10. Combien de personnes composent votre ménage en comptant votre enfant ?

1. 2-5

2. 6 ou plus

99 NSP/PR

11. Quartier/Village/ville de résidence \_\_\_\_\_

12. Ce centre de santé se trouve-t-il dans le quartier/ village/la ville où vous résidez

1. Oui  ➡ PASSEZ À LA QUESTION 14

2. Non  ➡ POURSUIVEZ AVEC LA QUESTION 13

3. NSP  ➡ PASSEZ À LA QUESTION 14

13. Pourquoi être venu dans cet établissement ?

1. Absence de services de santé dans mon village/ville de résidence

2. Il y a des services de santé dans la commune où j'habite mais ils traitent mal les patients

3. Cet établissement est sur mon trajet vers mon lieu de travail

4. Cet établissement est dans le/la même village/ville que la garderie ou l'école de l'enfant

5. Cet établissement propose de nombreux services de santé

6. C'est ici que j'ai toujours amené cet enfant

7. Autre  Précisez : \_\_\_\_\_

14. Depuis combien de temps vivez-vous dans ce village/cette ville ?

1. Toujours

2. \_\_\_\_\_ ans

3. \_\_\_\_\_ mois

4. \_\_\_\_\_ semaines

5. \_\_\_\_\_ jours

15. Quel moyen de transport utilisez-vous habituellement pour venir dans cet établissement ?

- 1. Marche
- 2. Vélo
- 3. Moto
- 4. Voiture
- 5. Bus
- 6. Autre  Précisez : \_\_\_\_\_

16. Combien de temps mettez-vous pour venir ici ? \_\_\_\_\_ Heures \_\_\_\_\_ Minutes

17. Le mois dernier, avez-vous entendu ou vu des messages sur la vaccination ?

- 1. Oui  ➔ POURSUIVEZ AVEC LA QUESTION 18
- 2. Non  ➔ PASSEZ À LA QUESTION 21

18. Où/Comment avez-vous entendu ou vu ces messages ?

- 1. Radio
- 2. Télévision
- 3. Journaux
- 4. Établissement de santé
- 5. Message téléphonique
- 6. Facebook ou internet
- 7. École des enfants
- 8. Église
- 9. Au cours d'une visite à domicile des agents de santé
- 10. Autre  Précisez : \_\_\_\_\_

19. Quel était le message ? \_\_\_\_\_

20. En quoi cette information vous a été utile ?

**(NE PAS LIRE LES PROPOSITIONS)**

- 1. Savoir où faire vacciner l'enfant
- 2. Avoir plus d'informations sur les vaccins
- 3. Décider de faire vacciner l'enfant
- 4. Aucune utilité
- 5. Autre  Précisez : \_\_\_\_\_

21. Quelle est votre source d'information sur la vaccination ? **(NE PAS LIRE LES PROPOSITIONS)**

**PLUSIEURS RÉPONSES SONT POSSIBLES**

- 1. Ne cherche pas d'informations  ➔ PASSEZ À LA QUESTION 23
- 2. Radio
- 3. Télévision
- 4. Journaux
- 5. Internet
- 6. Carte de vaccination, carnet ou passeport de santé
- 7. Autres parents/membres de la famille
- 8. École des enfants
- 9. Église, mosquée ou autre lieu de prière
- 10. Établissements de santé
- 11. Autre  Précisez : \_\_\_\_\_

22. Comment utilisez-vous les informations trouvées sur la vaccination ?

- 1. Savoir où faire vacciner l'enfant
- 2. Avoir plus d'informations que celles données par les services de santé
- 3. Décider de faire vacciner l'enfant
- 4. Aucune utilité
- 5. Autre  Précisez : \_\_\_\_\_

24. Avez-vous déjà fait vacciner votre enfant ?

1. Oui   
2. Non

24.1 Avez-vous déjà demandé une vaccination pour cet enfant qui vous a été refusée ?

1. Oui   
2. Non

➡ PASSEZ À LA QUESTION 25

24.2 Si oui, pourquoi n'ont-ils pas vacciné l'enfant ?

1. Le médecin ou l'infirmier a dit que cela n'était pas possible car l'enfant était malade   
2. Ils n'avaient pas de vaccins ou ils n'avaient pas de seringues ou d'autre matériel nécessaire à la vaccination   
3. Ce n'était pas une journée de vaccination   
4. La zone de vaccination était fermée   
5. La personne responsable de la vaccination était absente   
6. Il y avait beaucoup d'attente   
7. Le personnel ne nous a pas bien traité   
8. Nous n'avions pas le passeport/carnet de vaccination   
9. Les horaires de vaccination étaient limités   
10. Autre  Précisez : \_\_\_\_\_

25. Dans votre foyer, qui prend la décision de faire vacciner les enfants (PLUSIEURS RÉPONSES POSSIBLES)

1. Père   
2. Mère   
3. Autres parents   
4. Accord entre le père et la mère   
5. Autre  Précisez : \_\_\_\_\_

**UTILISATION DE LA CARTE DE VACCINATION/PASSEPORT DE SANTÉ ET INFORMATIONS SUR LES VACCINS ADMINISTRÉS**

26. Votre enfant a-t-il un carnet de vaccination/passeport de santé ?

1. Oui et je l'ai apporté  ➡ QUESTION 27  
2. Oui, mais je ne l'ai pas avec moi  ➡ QUESTION 26.1  
3. Non  ➡ QUESTION 26.1

26.1 À toutes les personnes interrogées, tout particulièrement si la personne n'a pas apporté le carnet de vaccination ou le passeport de santé aujourd'hui, demandez leur de fournir les informations demandées dans le Tableau ci-dessous  
Précisez-leur que ces informations seront uniquement utilisées pour faire correspondre les notes dans le dossier de l'établissement de santé.

|        |                             |       |
|--------|-----------------------------|-------|
| 26.1.1 | Identifiant sur la tablette | _____ |
| 26.1.2 | Prénom de l'enfant          | _____ |
| 26.1.3 | Nom de famille de l'enfant  | _____ |
| 26.1.4 | Adresse                     | _____ |
| 26.1.5 | Sexe                        | _____ |
| 26.1.6 | Date de naissance           | _____ |

➡ QUESTION 28

**26.1 À la fin de l'entretien, utilisez les informations ci-dessus pour remplir le Tableau 27**

**26.3 N'oubliez pas de photographier la page**

27. Demandez et vérifiez le carte de vaccination/passeport de santé de l'enfant ou son document

temporaire de vaccination pour remplir le tableau suivant. ➡ PUIS PASSEZ À LA QUESTION 29

**27.1 N'oubliez pas de photographier toutes les pages remplies du carnet/passeport de santé**

Tableau 27

|                                 |    |    |    |
|---------------------------------|----|----|----|
| Quels vaccins a reçu l'enfant ? | A. | B. | C. |
|---------------------------------|----|----|----|

|                 | Dates de toutes les doses administrées |       |       | Rappel         | Administré aujourd'hui ? |                          |
|-----------------|----------------------------------------|-------|-------|----------------|--------------------------|--------------------------|
|                 | JOUR                                   | MOIS  | ANNÉE |                | OUI                      | NON                      |
| 1. BCG          | / / /                                  | / / / | / / / | À la naissance | <input type="checkbox"/> | <input type="checkbox"/> |
| 2. VPO0         | / / /                                  | / / / | / / / | 0 - 14 jours   | <input type="checkbox"/> | <input type="checkbox"/> |
| 3. VPO1         | / / /                                  | / / / | / / / | À 8 semaines   | <input type="checkbox"/> | <input type="checkbox"/> |
| 4. Rota1        | / / /                                  | / / / | / / / | À 8 semaines   | <input type="checkbox"/> | <input type="checkbox"/> |
| 5. DTC1/Penta1  | / / /                                  | / / / | / / / | À 8 semaines   | <input type="checkbox"/> | <input type="checkbox"/> |
| 6. PCV1         | / / /                                  | / / / | / / / | À 8 semaines   | <input type="checkbox"/> | <input type="checkbox"/> |
| 7. VPO2         | / / /                                  | / / / | / / / | À 12 semaines  | <input type="checkbox"/> | <input type="checkbox"/> |
| 8. Rota2        | / / /                                  | / / / | / / / | À 12 semaines  | <input type="checkbox"/> | <input type="checkbox"/> |
| 9. DTC2/Penta2  | / / /                                  | / / / | / / / | À 12 semaines  | <input type="checkbox"/> | <input type="checkbox"/> |
| 10. PCV2        | / / /                                  | / / / | / / / | À 12 semaines  | <input type="checkbox"/> | <input type="checkbox"/> |
| 11. VPO3        | / / /                                  | / / / | / / / | À 16 semaines  | <input type="checkbox"/> | <input type="checkbox"/> |
| 12. DTC3/Penta3 | / / /                                  | / / / | / / / | À 16 semaines  | <input type="checkbox"/> | <input type="checkbox"/> |
| 13. PCV3        | / / /                                  | / / / | / / / | À 16 semaines  | <input type="checkbox"/> | <input type="checkbox"/> |
| 14. Rota 3      | / / /                                  | / / / | / / / | À 16 semaines  | <input type="checkbox"/> | <input type="checkbox"/> |
| 15. RR1         | / / /                                  | / / / | / / / | À 9 - 11 mois  | <input type="checkbox"/> | <input type="checkbox"/> |
| 16. VAA         | / / /                                  | / / / | / / / | À 9 - 11 mois  | <input type="checkbox"/> | <input type="checkbox"/> |
| 17. RR2         | / / /                                  | / / / | / / / | À 15 - 18 mois | <input type="checkbox"/> | <input type="checkbox"/> |

27.2 Où avez-vous trouvé les informations du Tableau 27 ?

- 1. Carte de vaccination/passeport de santé
- 2. Document temporaire de vaccination
- 3. Registre de l'établissement de santé

28. Pourriez-vous nous dire pourquoi vous n'avez pas le carnet de vaccination/passeport de santé avec vous aujourd'hui ?

- 1. Il est à la maternelle/à la garderie
- 2. Je l'ai laissé à la maison (je n'ai pas pensé à l'apporter)
- 3. Je l'ai laissé à la maison (je ne savais pas que c'était important de l'apporter)
- 4. Je l'ai perdu
- 5. Le carnet/passeport de santé a été endommagé
- 6. On ne m'en a jamais donné ➡ PASSEZ À LA QUESTION 31
- 7. Je n'étais pas venu pour une vaccination
- 8. Autre  Précisez : \_\_\_\_\_

29. Avez-vous déjà perdu le carnet de vaccination/passeport de santé de cet enfant ?

- 1. Oui
- 2. Non  ➡ PASSEZ À LA QUESTION 31

30. Avez-vous rencontré des difficultés pour le faire remplacer ?

- 1. Oui
- 2. Non

31. Pouvez-vous me dire à quoi sert le carnet de vaccination/passeport de santé ?

- 1. Pour savoir quels vaccins l'enfant a reçu et quels vaccins doivent être administrés
- 2. Autre  Précisez : \_\_\_\_\_
- 3. NSP/PR

32. Aujourd'hui, au cours de votre visite dans l'établissement de santé, le personnel/l'équipe vous a-t-il/elle demandé le carnet de vaccination/passeport de santé de l'enfant ?

- 1. Oui
- 2. Non
- 3. Non, mais on m'a demandé si l'enfant était vacciné

**DONNÉES DE VACCINATION**

33. Votre enfant a-t-il été vacciné au cours de cette visite dans l'établissement de santé ?

1. Oui  ➔ PASSEZ À LA QUESTION 35  
 2. Non

34. Pourquoi n'ont-ils pas vacciné l'enfant ? (Veuillez NE PAS lire les propositions)  
**ÉCOUTEZ D'ABORD LES RAISONS DONNÉES PAR LA PERSONNE QUI ACCOMPAGNE L'ENFANT PUIS ESSAYEZ DE CHOISIR LES BONNES PROPOSITIONS DANS LES BLOCS A, B OU C CI-DESSOUS**

**A. RAISONS LIÉES AUX AGENTS DE SANTÉ**

1. Le médecin/l'infirmier a dit que l'enfant était déjà vacciné, avait déjà reçu toutes les doses ou n'avait pas besoin d'être vacciné pour le moment   
 2. Les agents de santé ne me l'ont pas demandé   
 3. Le médecin/l'infirmier a dit que l'enfant ne pouvait pas être vacciné car il/elle était malade   
**Types de maladies ou de traitements reçus aujourd'hui (cochez toutes les réponses correspondantes)**  
 1. Rhume et/ou toux   
 2. Diarrhée   
 3. Parasitose intestinale   
 4. Pneumonie   
 5. Malnutrition et/ou anémie   
 6. Légère fièvre   
 7. Faible poids à la naissance   
 8. Déshydratation   
 9. L'enfant prend des médicaments : notez leur nom générique \_\_\_\_\_   
 10. Infection des voies urinaires   
 11. Autre maladie  Précisez : \_\_\_\_\_

Enquêteur : SI LES RAISONS DONNÉES PAR LA PERSONNE INTERROGÉE CORRESPONDENT AU BLOC A CI-DESSUS, ➔ PASSEZ À LA QUESTION 45

**B. RAISONS LIÉES A LA PERSONNE QUI ACCOMPAGNE L'ENFANT**

1. La dernière fois que l'enfant a été vacciné, il/elle est tombé(e) malade ou a fait une réaction.   
 2. Ma religion ne l'autorise pas.   
 3. Expériences négatives d'un membre de la famille ou d'une connaissance.   
 4. Je ne fais pas confiance aux vaccins de l'établissement de santé   
 5. Je ne fais pas confiance au personnel des établissements de santé   
 6. J'ai oublié   
 7. Les vaccins peuvent entraîner des maladies ou une gêne   
 8. Je n'ai pas le temps   
 9. Les vaccins ne sont pas nécessaires ou je ne crois pas aux effets des vaccins   
 10. L'enfant a reçu une vaccination complète   
 11. La vaccination n'était pas le but de cette visite   
 12. Autre  Précisez : \_\_\_\_\_

Enquêteur : SI LES RAISONS DONNÉES PAR LA PERSONNE INTERROGÉE CORRESPONDENT AU BLOC B CI-DESSUS, ➔ PASSEZ À LA QUESTION 45

**C. RAISONS LIÉES À LA LOGISTIQUE ET À L'ORGANISATION DE L'ÉTABLISSEMENT DE SANTÉ**

1. Il n'y avait pas de vaccins   
 2. Il n'y avait pas de seringues ou d'autre matériel nécessaire à la vaccination   
 3. Ce n'est pas une journée de vaccination dans cet établissement de santé   
 4. La zone de vaccination était fermée   
 5. La personne responsable des vaccinations n'était pas là   
 6. Il y avait beaucoup d'attente   
 7. Le personnel nous a mal traité   
 8. Les horaires de vaccination sont limités   
 9. Autre  Précisez : \_\_\_\_\_

**Enquêteur : SI LES RAISONS DONNÉES PAR LA PERSONNE INTERROGÉE CORRESPONDENT AU BLOC C CI-DESSUS,  
 ➡ PASSEZ À LA QUESTION 45**

35. Combien de temps avez-vous attendu aujourd'hui pour que votre enfant soit vacciné ?  
 \_\_\_\_\_ Heures \_\_\_\_\_ Minutes

**QUALITÉ DU SERVICE DE VACCINATION**

36. Aujourd'hui, vous ont-ils dit quels vaccins étaient administrés à l'enfant ?

- 1. Oui
- 2. Non
- 3. PR

37. Aujourd'hui, vous ont-ils donné la date du prochain rendez-vous de vaccination et l'ont-ils écrite sur le carnet de vaccination/passeport de santé ?

- 1. Oui
- 2. Non

39. Aujourd'hui, vous a-t-on informé des possibles « réactions » pouvant apparaître suite à une vaccination ?

- 1. Oui
- 2. Non

➡ PASSEZ À LA QUESTION 41

40. Si oui, que vous ont-ils dit ?

\_\_\_\_\_

\_\_\_\_\_

41. Aujourd'hui, vous a-t-on informé sur ce que vous devez faire au cas où l'enfant « réagirait » aux vaccins ?

- 1. Oui
- 2. Non

42. Êtes-vous satisfait du service fourni aujourd'hui ?

- 1. Oui
- 2. Non

➡ PASSEZ À LA QUESTION 44

43. Pourquoi ?

- 1. Attention immédiate
- 2. Le personnel nous a traité aimablement
- 3. Le service était gratuit
- 4. Autre

Précisez : \_\_\_\_\_

- ➡ PASSEZ À LA QUESTION 45

44. Pourquoi n'avez-vous pas été satisfait ?

- 1. Attente trop longue
- 2. Le personnel était peu courtois
- 3. Le langage utilisé par les agents de santé n'était pas clair
- 4. Ils n'ont pas expliqué quels vaccins ils donnaient à l'enfant
- 5. Autre

Précisez : \_\_\_\_\_

45. Vous a-t-on déjà demandé de payer les vaccins administrés à un enfant ?

- 1. Oui
- 2. Non

➡ PASSEZ À LA QUESTION 47

46. L'établissement de santé qui m'a demandé de payer était :

- 1. Public
- 2. Privé
- 3. NSP

**RAISONS DE LA VACCINATION**

47. Pourriez-vous me dire l'objectif de la vaccination ? (cochez toutes les réponses correspondantes)

\_\_\_\_\_

**Veillez NE PAS lire les propositions**

- 1. Éviter les maladies
- 2. Permettre aux enfants de grandir en bonne santé
- 3. Guérir les maladies
- 4. Cela n'apporte rien de bien
- 5. Je ne sais pas trop à quoi cela sert

48. De quelles maladies nous protègent les vaccins ? (cochez toutes les réponses correspondantes)

**Veillez NE PAS lire les propositions**

- 1. Tuberculose
- 2. Hépatite
- 3. Poliomyélite ou polio
- 4. Diphtérie
- 5. Coqueluche
- 6. Tétanos
- 7. Pneumonie
- 8. Méningite
- 9. Diarrhée
- 10. Grippe
- 11. Rougeole
- 12. Rubéole
- 13. Oreillons
- 14. Fièvre jaune
- 15. Cancer  Précisez : \_\_\_\_\_
- 16. Autre  Précisez : \_\_\_\_\_
- 17. Aucune
- 18. NSP

49. Pensez-vous que votre enfant peut attraper des maladies si vous ne le vaccinez pas ?

- 1. Oui
- 2. Non
- 3. NSP

50. Que suggérez-vous pour améliorer les services de vaccination ?

- 1. Il devrait y avoir plus de personnel de vaccination
- 2. Il devrait y avoir moins d'attente
- 3. Les horaires et jours de vaccination ne devraient pas être limités
- 4. Les carnets de vaccination ne devraient pas être distribués
- 5. Le traitement du public et des enfants à vacciner devrait être plus agréable
- 6. Le centre de santé devrait toujours avoir des vaccins
- 7. Ils devraient fournir des informations sur les vaccins administrés, sur les maladies qu'ils évitent et sur les réactions qu'ils entraînent.
- 8. Autre  Précisez : \_\_\_\_\_
- 9. Rien
- 10. NSP
- 11. PR

Enquêteur : Remerciez la personne interrogée et notez à quelle heure l'entretien s'est terminé.

Lisez la déclaration suivante : « N'oubliez pas que la vaccination est un droit pour tous.

Réclamez ce droit et pensez à apporter le carnet de vaccination de votre enfant à

l'établissement de santé chaque fois que vous vous y rendez, pour quelque raison que ce soit. »

Heure de fin : Heure : |\_\_|\_\_| Minutes : |\_\_|\_\_|

Commentaires de l'enquêteur : \_\_\_\_\_

\_\_\_\_\_



Superviseur : Veuillez vérifier l'exactitude et l'exhaustivité du formulaire complété

1. Le formulaire a été rempli de manière précise et totale (l'enchaînement des questions a été respecté)
2. Erreurs ou incohérences sur le formulaire

  

Commentaires du superviseur : \_\_\_\_\_

\_\_\_\_\_

Nom et prénom du superviseur :

\_\_\_\_\_

Signature du superviseur :

\_\_\_\_\_
